# Supplementary material for: Comprehensive analysis and identification of heat-responsive genes in Agarophyton vermiculophyllum by RNA-sequencing
Source: publisher site journal article supplement (doi:10.1515/bot-2020-0006), 2020-06-29
Supplement: Supplementary file 1 [file j_bot-2020-0006_suppl_002.docx]

| **Supplementary Table S2:** Kyoto Encyclopedia of Genes and Genomes (KEGG) classification of *A. vermiculophyllum* unigenes. | | |
| --- | --- | --- |
| Annotated Gene Number: 16086 | | |
| Pathway Hierarchy1 | Pathway Hierarchy2 | Gene Number |
| Cellular Processes | Transport and catabolism | 1326 |
| Environmental Information Processing | Membrane transport | 97 |
| Environmental Information Processing | Signal transduction | 120 |
| Genetic Information Processing | Folding, sorting and degradation | 2570 |
| Genetic Information Processing | Replication and repair | 176 |
| Genetic Information Processing | Transcription | 988 |
| Genetic Information Processing | Translation | 2831 |
| Metabolism | Amino acid metabolism | 860 |
| Metabolism | Biosynthesis of other secondary metabolites | 88 |
| Metabolism | Carbohydrate metabolism | 1215 |
| Metabolism | Energy metabolism | 1462 |
| Metabolism | Glycan biosynthesis and metabolism | 56 |
| Metabolism | Lipid metabolism | 469 |
| Metabolism | Metabolism of cofactors and vitamins | 502 |
| Metabolism | Metabolism of other amino acids | 300 |
| Metabolism | Metabolism of terpenoids and polyketides | 176 |
| Metabolism | Nucleotide metabolism | 301 |
| Metabolism | Overview | 1372 |
| Organismal Systems | Environmental adaptation | 676 |
