# Supplementary material for: Comprehensive analysis and identification of heat-responsive genes in Agarophyton vermiculophyllum by RNA-sequencing
Source: publisher site journal article supplement (doi:10.1515/bot-2020-0006), 2020-06-29
Supplement: Supplementary file 2 [file j_bot-2020-0006_suppl_004.docx]

| **Supplementary Table S4:** Top 20 most enriched functional groups of *A. vermiculophyllum* differentially expressed genes (DEGs) between the heat stress treatment (H) and control (C) in the gene ontology (GO) categories. | | | | |
| --- | --- | --- | --- | --- |
| GO_Term | Name | Ontology | Percent | Number | |
| GO:0044699 | single-organism process | biological_process | 64.57 | 1296 | |
| GO:0050896 | response to stimulus | biological_process | 30.64 | 615 | |
| GO:1901362 | organic cyclic compound biosynthetic process | biological_process | 30.64 | 615 | |
| GO:0032774 | RNA biosynthetic process | biological_process | 23.82 | 478 | |
| GO:0006351 | transcription, DNA-templated | biological_process | 23.62 | 474 | |
| GO:0097659 | nucleic acid-templated transcription | biological_process | 23.62 | 474 | |
| GO:0006950 | response to stress | biological_process | 17.09 | 343 | |
| GO:0006396 | RNA processing | biological_process | 12.71 | 255 | |
| GO:0006457 | protein folding | biological_process | 6.98 | 140 | |
| GO:0005667 | transcription factor complex | cellular_component | 13.55 | 272 | |
| GO:0005694 | chromosome | cellular_component | 9.62 | 193 | |
| GO:0044427 | chromosomal part | cellular_component | 8.72 | 175 | |
| GO:0005515 | protein binding | molecular_function | 44.29 | 889 | |
| GO:0016740 | transferase activity | molecular_function | 33.93 | 681 | |
| GO:0005524 | ATP binding | molecular_function | 25.21 | 506 | |
| GO:0032559 | adenyl ribonucleotide binding | molecular_function | 25.21 | 506 | |
| GO:0016772 | transferase activity, transferring phosphorus-containing groups | molecular_function | 18.09 | 363 | |
| GO:0003723 | RNA binding | molecular_function | 15.15 | 304 | |
| GO:0022891 | substrate-specific transmembrane transporter activity | molecular_function | 14.6 | 293 | |
| GO:0051082 | unfolded protein binding | molecular_function | 7.08 | 142 | |
