# Supplementary material for: Comprehensive analysis and identification of heat-responsive genes in Agarophyton vermiculophyllum by RNA-sequencing
Source: publisher site journal article supplement (doi:10.1515/bot-2020-0006), 2020-06-29
Supplement: Supplementary file 4 [file j_bot-2020-0006_suppl_007.docx]

| **Supplementary Table S7:** Differentially-expressed *A. vermiculophyllum* transcript factor (TF) unigenes between the heat stress treatment (H) and control (C) groups. | | | | |
| --- | --- | --- | --- | --- |
| tf_id | tf_Family | Genes | NR ID | NR Description |
| Cluster-14487.17879_5 | ARID | Cluster-14487.17879 | XP_005714450.1 | alanine--tRNA ligase [Chondrus crispus]>gi|507110892|emb|CDF34631.1| alanine--tRNA ligase [Chondrus crispus] |
| Cluster-14487.10946_1 | bHLH | Cluster-14487.10946 | XP_005714384.1 | amine oxidase, partial [Chondrus crispus]>gi|507110821|emb|CDF34565.1| amine oxidase, partial [Chondrus crispus] |
| Cluster-14487.2903_2 | bHLH | Cluster-14487.2903 | XP_002291158.1 | predicted protein [Thalassiosira pseudonana CCMP1335]>gi|220972934|gb|EED91265.1| predicted protein [Thalassiosira pseudonana CCMP1335] |
| Cluster-14487.2905_2 | bHLH | Cluster-14487.2905 | XP_002291158.1 | predicted protein [Thalassiosira pseudonana CCMP1335]>gi|220972934|gb|EED91265.1| predicted protein [Thalassiosira pseudonana CCMP1335] |
| Cluster-14487.16785_4 | bZIP | Cluster-14487.16785 | XP_005713551.1 | unnamed protein product [Chondrus crispus]>gi|507109946|emb|CDF33732.1| unnamed protein product [Chondrus crispus] |
| Cluster-14487.18853_4 | bZIP | Cluster-14487.18853 | XP_005713551.1 | unnamed protein product [Chondrus crispus]>gi|507109946|emb|CDF33732.1| unnamed protein product [Chondrus crispus] |
| Cluster-14487.15837_4 | bZIP | Cluster-14487.15837 | XP_005713551.1 | unnamed protein product [Chondrus crispus]>gi|507109946|emb|CDF33732.1| unnamed protein product [Chondrus crispus] |
| Cluster-14487.17045_4 | bZIP | Cluster-14487.17045 | XP_005713551.1 | unnamed protein product [Chondrus crispus]>gi|507109946|emb|CDF33732.1| unnamed protein product [Chondrus crispus] |
| Cluster-14487.17854_4 | bZIP | Cluster-14487.17854 | XP_005713551.1 | unnamed protein product [Chondrus crispus]>gi|507109946|emb|CDF33732.1| unnamed protein product [Chondrus crispus] |
| Cluster-14487.34287_0 | bZIP | Cluster-14487.34287 | EJK75561.1 | hypothetical protein THAOC_02710 [Thalassiosira oceanica] |
| Cluster-14487.21476_4 | bZIP | Cluster-14487.21476 | XP_005713551.1 | unnamed protein product [Chondrus crispus]>gi|507109946|emb|CDF33732.1| unnamed protein product [Chondrus crispus] |
| Cluster-1816.2_5 | bZIP | Cluster-1816.2 | XP_002183333.1 | predicted protein [Phaeodactylum tricornutum CCAP 1055/1]>gi|217405089|gb|EEC45033.1| predicted protein [Phaeodactylum tricornutum CCAP 1055/1] |
| Cluster-14487.16603_4 | bZIP | Cluster-14487.16603 | XP_005713551.1 | unnamed protein product [Chondrus crispus]>gi|507109946|emb|CDF33732.1| unnamed protein product [Chondrus crispus] |
| Cluster-5628.0_3 | bZIP | Cluster-5628.0 | -- | -- |
| Cluster-14487.25990_3 | C2C2-GATA | Cluster-14487.25990 | -- | -- |
| Cluster-14487.9340_1 | C2H2 | Cluster-14487.9340 | XP_007511266.1 | PREDICTED: similar to Zinc finger protein 271 (Zinc finger protein 7) (HZF7) (Zinc finger protein ZNFphex133) (Epstein-Barr virus-induced zinc finger protein) (ZNF-EB) (CT-ZFP48) (Zinc finger protein [Bathycoccus prasinos]>gi|424513242|emb|CCO66826.1| PREDICTED: similar to Zinc finger protein 271 (Zinc finger protein 7) (HZF7) (Zinc finger protein ZNFphex133) (Epstein-Barr virus-induced zinc finger protein) (ZNF-EB) (CT-ZFP48) (Zinc finger protein [Bathycoccus prasinos] |
| Cluster-14487.13751_5 | C2H2 | Cluster-14487.13751 | XP_005711089.1 | unnamed protein product [Chondrus crispus]>gi|507107291|emb|CDF40795.1| unnamed protein product [Chondrus crispus] |
| Cluster-14487.19456_4 | C2H2 | Cluster-14487.19456 | XP_005716976.1 | unnamed protein product [Chondrus crispus]>gi|507113533|emb|CDF37157.1| unnamed protein product [Chondrus crispus] |
| Cluster-14487.16021_1 | C2H2 | Cluster-14487.16021 | XP_007508846.1 | PREDICTED: similar to Zinc finger protein 271 (Zinc finger protein 7) (HZF7) (Zinc finger protein ZNFphex133) (Epstein-Barr virus-induced zinc finger protein) (ZNF-EB) (CT-ZFP48) (Zinc finger protein [Bathycoccus prasinos]>gi|412992219|emb|CCO19932.1| PREDICTED: similar to Zinc finger protein 271 (Zinc finger protein 7) (HZF7) (Zinc finger protein ZNFphex133) (Epstein-Barr virus-induced zinc finger protein) (ZNF-EB) (CT-ZFP48) (Zinc finger protein [Bathycoccus prasinos] |
| Cluster-14487.16644_1 | C2H2 | Cluster-14487.16644 | XP_007508846.1 | PREDICTED: similar to Zinc finger protein 271 (Zinc finger protein 7) (HZF7) (Zinc finger protein ZNFphex133) (Epstein-Barr virus-induced zinc finger protein) (ZNF-EB) (CT-ZFP48) (Zinc finger protein [Bathycoccus prasinos]>gi|412992219|emb|CCO19932.1| PREDICTED: similar to Zinc finger protein 271 (Zinc finger protein 7) (HZF7) (Zinc finger protein ZNFphex133) (Epstein-Barr virus-induced zinc finger protein) (ZNF-EB) (CT-ZFP48) (Zinc finger protein [Bathycoccus prasinos] |
| Cluster-14487.18690_2 | C2H2 | Cluster-14487.18690 | XP_005711433.1 | unnamed protein product [Chondrus crispus]>gi|507107694|emb|CDF41139.1| unnamed protein product [Chondrus crispus] |
| Cluster-14487.13126_4 | C2H2 | Cluster-14487.13126 | XP_005715866.1 | unnamed protein product [Chondrus crispus]>gi|507112361|emb|CDF36047.1| unnamed protein product [Chondrus crispus] |
| Cluster-14487.13099_2 | C2H2 | Cluster-14487.13099 | XP_005710110.1 | Vacuolar-type H+-ATPase, V1A subunit [Chondrus crispus]>gi|507106141|emb|CDF39816.1| Vacuolar-type H+-ATPase, V1A subunit [Chondrus crispus] |
| Cluster-14487.22662_1 | C2H2 | Cluster-14487.22662 | XP_005710110.1 | Vacuolar-type H+-ATPase, V1A subunit [Chondrus crispus]>gi|507106141|emb|CDF39816.1| Vacuolar-type H+-ATPase, V1A subunit [Chondrus crispus] |
| Cluster-14487.15780_2 | CCAAT | Cluster-14487.15780 | XP_005715904.1 | Histone H2A [Chondrus crispus]>gi|507112402|emb|CDF36085.1| Histone H2A [Chondrus crispus] |
| Cluster-730.0_4 | CCAAT | Cluster-730.0 | CBJ32597.1 | conserved unknown protein [Ectocarpus siliculosus] |
| Cluster-14487.11970_5 | CPP | Cluster-14487.11970 | XP_005717230.1 | unnamed protein product [Chondrus crispus]>gi|507113806|emb|CDF37411.1| unnamed protein product [Chondrus crispus] |
| Cluster-14487.15551_3 | E2F-DP | Cluster-14487.15551 | XP_005711716.1 | unnamed protein product [Chondrus crispus]>gi|507108046|emb|CDF41422.1| unnamed protein product [Chondrus crispus] |
| Cluster-14487.14005_5 | E2F-DP | Cluster-14487.14005 | XP_005711716.1 | unnamed protein product [Chondrus crispus]>gi|507108046|emb|CDF41422.1| unnamed protein product [Chondrus crispus] |
| Cluster-14487.19364_2 | G2-like | Cluster-14487.19364 | XP_005717108.1 | GTP-binding protein of TypA (tyrosine phosphorylated protein A) family [Chondrus crispus]>gi|507113675|emb|CDF37289.1| GTP-binding protein of TypA (tyrosine phosphorylated protein A) family [Chondrus crispus] |
| Cluster-14487.17846_0 | GNAT | Cluster-14487.17846 | XP_005709977.1 | aspartyl-tRNA synthetase [Chondrus crispus]>gi|507105995|emb|CDF39683.1| aspartyl-tRNA synthetase [Chondrus crispus] |
| Cluster-14487.16619_2 | GNAT | Cluster-14487.16619 | XP_005709977.1 | aspartyl-tRNA synthetase [Chondrus crispus]>gi|507105995|emb|CDF39683.1| aspartyl-tRNA synthetase [Chondrus crispus] |
| Cluster-14487.24182_2 | GNAT | Cluster-14487.24182 | XP_005715249.1 | unnamed protein product [Chondrus crispus]>gi|507111718|emb|CDF35430.1| unnamed protein product [Chondrus crispus] |
| Cluster-14487.17847_1 | GNAT | Cluster-14487.17847 | XP_005711613.1 | unnamed protein product [Chondrus crispus]>gi|507107919|emb|CDF41319.1| unnamed protein product [Chondrus crispus] |
| Cluster-14487.17256_0 | GNAT | Cluster-14487.17256 | XP_005713231.1 | unnamed protein product [Chondrus crispus]>gi|507109613|emb|CDF33428.1| unnamed protein product [Chondrus crispus] |
| Cluster-14487.20977_4 | GNAT | Cluster-14487.20977 | XP_005711613.1 | unnamed protein product [Chondrus crispus]>gi|507107919|emb|CDF41319.1| unnamed protein product [Chondrus crispus] |
| Cluster-14487.18852_4 | GNAT | Cluster-14487.18852 | XP_005714462.1 | unnamed protein product [Chondrus crispus]>gi|507110904|emb|CDF34643.1| unnamed protein product [Chondrus crispus] |
| Cluster-14487.13763_0 | GNAT | Cluster-14487.13763 | XP_005709977.1 | aspartyl-tRNA synthetase [Chondrus crispus]>gi|507105995|emb|CDF39683.1| aspartyl-tRNA synthetase [Chondrus crispus] |
| Cluster-14487.16836_2 | GNAT | Cluster-14487.16836 | XP_005709977.1 | aspartyl-tRNA synthetase [Chondrus crispus]>gi|507105995|emb|CDF39683.1| aspartyl-tRNA synthetase [Chondrus crispus] |
| Cluster-14487.19543_5 | GNAT | Cluster-14487.19543 | XP_005713605.1 | unnamed protein product [Chondrus crispus]>gi|507110002|emb|CDF33786.1| unnamed protein product [Chondrus crispus] |
| Cluster-14487.9128_1 | HB | Cluster-14487.9128 | XP_005714258.1 | unnamed protein product [Chondrus crispus]>gi|507110690|emb|CDF34439.1| unnamed protein product [Chondrus crispus] |
| Cluster-14487.34260_1 | HSF | Cluster-14487.34260 | XP_002186160.1 | heat shock factor, DNA-binding [Phaeodactylum tricornutum CCAP 1055/1]>gi|209583010|gb|ACI65630.1| heat shock factor, DNA-binding [Phaeodactylum tricornutum CCAP 1055/1] |
| Cluster-14487.5221_0 | HSF | Cluster-14487.5221 | XP_002186120.1 | predicted protein [Phaeodactylum tricornutum CCAP 1055/1]>gi|209582970|gb|ACI65590.1| predicted protein [Phaeodactylum tricornutum CCAP 1055/1] |
| Cluster-14487.1817_2 | HSF | Cluster-14487.1817 | XP_002186120.1 | predicted protein [Phaeodactylum tricornutum CCAP 1055/1]>gi|209582970|gb|ACI65590.1| predicted protein [Phaeodactylum tricornutum CCAP 1055/1] |
| Cluster-14487.1874_2 | HSF | Cluster-14487.1874 | XP_002987932.1 | hypothetical protein SELMODRAFT_39384, partial [Selaginella moellendorffii]>gi|302824772|ref|XP_002994026.1| hypothetical protein SELMODRAFT_39381, partial [Selaginella moellendorffii]>gi|300138129|gb|EFJ04908.1| hypothetical protein SELMODRAFT_39381, partial [Selaginella moellendorffii]>gi|300144321|gb|EFJ11006.1| hypothetical protein SELMODRAFT_39384, partial [Selaginella moellendorffii] |
| Cluster-2699.0_2 | HSF | Cluster-2699.0 | XP_002180096.1 | predicted protein [Phaeodactylum tricornutum CCAP 1055/1]>gi|217408353|gb|EEC48287.1| predicted protein [Phaeodactylum tricornutum CCAP 1055/1] |
| Cluster-14487.31448_1 | HSF | Cluster-14487.31448 | XP_002186160.1 | heat shock factor, DNA-binding [Phaeodactylum tricornutum CCAP 1055/1]>gi|209583010|gb|ACI65630.1| heat shock factor, DNA-binding [Phaeodactylum tricornutum CCAP 1055/1] |
| Cluster-14487.24248_2 | MADS | Cluster-14487.24248 | XP_005703529.1 | ATP-dependent Clp protease adaptor protein ClpS [Galdieria sulphuraria]>gi|452819960|gb|EME27009.1| ATP-dependent Clp protease adaptor protein ClpS [Galdieria sulphuraria] |
| Cluster-14487.24920_1 | MADS | Cluster-14487.24920 | XP_005703529.1 | ATP-dependent Clp protease adaptor protein ClpS [Galdieria sulphuraria]>gi|452819960|gb|EME27009.1| ATP-dependent Clp protease adaptor protein ClpS [Galdieria sulphuraria] |
| Cluster-14487.12890_3 | mTERF | Cluster-14487.12890 | XP_005712849.1 | unnamed protein product [Chondrus crispus]>gi|507109219|emb|CDF33046.1| unnamed protein product [Chondrus crispus] |
| Cluster-14487.8399_1 | MYB | Cluster-14487.8399 | XP_005713261.1 | unnamed protein product [Chondrus crispus]>gi|507109646|emb|CDF33458.1| unnamed protein product [Chondrus crispus] |
| Cluster-14487.16969_1 | MYB | Cluster-14487.16969 | XP_005710372.1 | Serine/threonine protein kinase/endoribonuclease, ERN [Chondrus crispus]>gi|507106448|emb|CDF40078.1| Serine/threonine protein kinase/endoribonuclease, ERN [Chondrus crispus] |
| Cluster-14487.14710_3 | Orphans | Cluster-14487.14710 | XP_005716422.1 | unnamed protein product [Chondrus crispus]>gi|507112952|emb|CDF36603.1| unnamed protein product [Chondrus crispus] |
| Cluster-14487.14710_3 | Orphans | Cluster-14487.14710 | XP_005716422.1 | unnamed protein product [Chondrus crispus]>gi|507112952|emb|CDF36603.1| unnamed protein product [Chondrus crispus] |
| Cluster-14487.10426_3 | Orphans | Cluster-14487.10426 | XP_005714488.1 | unnamed protein product [Chondrus crispus]>gi|507110931|emb|CDF34669.1| unnamed protein product [Chondrus crispus] |
| Cluster-14487.33220_0 | Orphans | Cluster-14487.33220 | XP_002186046.1 | predicted protein [Phaeodactylum tricornutum CCAP 1055/1]>gi|209582896|gb|ACI65516.1| predicted protein [Phaeodactylum tricornutum CCAP 1055/1] |
| Cluster-14487.31779_2 | PHD | Cluster-14487.31779 | XP_002179989.1 | predicted protein [Phaeodactylum tricornutum CCAP 1055/1]>gi|217408246|gb|EEC48180.1| predicted protein [Phaeodactylum tricornutum CCAP 1055/1] |
| Cluster-9336.1_5 | PHD | Cluster-9336.1 | XP_002997457.1 | conserved hypothetical protein [Phytophthora infestans T30-4]>gi|262110713|gb|EEY68765.1| conserved hypothetical protein [Phytophthora infestans T30-4] |
| Cluster-14487.11007_4 | RB | Cluster-14487.11007 | XP_005710938.1 | Putative Acyl-COA dehydrogenase [Chondrus crispus]>gi|507107108|emb|CDF40644.1| Putative Acyl-COA dehydrogenase [Chondrus crispus] |
| Cluster-14487.18692_4 | RB | Cluster-14487.18692 | XP_005710938.1 | Putative Acyl-COA dehydrogenase [Chondrus crispus]>gi|507107108|emb|CDF40644.1| Putative Acyl-COA dehydrogenase [Chondrus crispus] |
| Cluster-14487.19309_2 | Rcd1-like | Cluster-14487.19309 | XP_005719417.1 | unnamed protein product [Chondrus crispus]>gi|507116109|emb|CDF39506.1| unnamed protein product [Chondrus crispus] |
| Cluster-7763.0_1 | SET | Cluster-7763.0 | XP_002291362.1 | set domain-containing protein [Thalassiosira pseudonana CCMP1335]>gi|220973138|gb|EED91469.1| set domain-containing protein, partial [Thalassiosira pseudonana CCMP1335] |
| Cluster-14487.19737_0 | SET | Cluster-14487.19737 | XP_005717072.1 | Cytoplasmic dynein heavy chain [Chondrus crispus]>gi|507113633|emb|CDF37253.1| Cytoplasmic dynein heavy chain [Chondrus crispus] |
| Cluster-14487.19555_0 | SET | Cluster-14487.19555 | XP_005711019.1 | unnamed protein product [Chondrus crispus]>gi|507107206|emb|CDF40725.1| unnamed protein product [Chondrus crispus] |
| Cluster-14487.34654_4 | Sigma70-like | Cluster-14487.34654 | XP_002177268.1 | predicted protein [Phaeodactylum tricornutum CCAP 1055/1]>gi|217411803|gb|EEC51731.1| predicted protein [Phaeodactylum tricornutum CCAP 1055/1] |
| Cluster-14487.24046_2 | SNF2 | Cluster-14487.24046 | XP_005714998.1 | unnamed protein product [Chondrus crispus]>gi|507111458|emb|CDF35180.1| unnamed protein product [Chondrus crispus] |
| Cluster-14487.24928_1 | SNF2 | Cluster-14487.24928 | XP_005714998.1 | unnamed protein product [Chondrus crispus]>gi|507111458|emb|CDF35180.1| unnamed protein product [Chondrus crispus] |
| Cluster-14487.21092_0 | SNF2 | Cluster-14487.21092 | XP_005719085.1 | unnamed protein product [Chondrus crispus]>gi|507115741|emb|CDF39174.1| unnamed protein product [Chondrus crispus] |
| Cluster-14487.13730_3 | SNF2 | Cluster-14487.13730 | XP_005719085.1 | unnamed protein product [Chondrus crispus]>gi|507115741|emb|CDF39174.1| unnamed protein product [Chondrus crispus] |
| Cluster-14487.14598_3 | SNF2 | Cluster-14487.14598 | XP_005714472.1 | signal recognition particle recognition component SRP54 [Chondrus crispus]>gi|507110915|emb|CDF34653.1| signal recognition particle recognition component SRP54 [Chondrus crispus] |
| Cluster-14487.11585_3 | SNF2 | Cluster-14487.11585 | XP_005715401.1 | unnamed protein product [Chondrus crispus]>gi|507111876|emb|CDF35582.1| unnamed protein product [Chondrus crispus] |
| Cluster-14487.24418_3 | SNF2 | Cluster-14487.24418 | XP_005715401.1 | unnamed protein product [Chondrus crispus]>gi|507111876|emb|CDF35582.1| unnamed protein product [Chondrus crispus] |
| Cluster-14487.11586_3 | SNF2 | Cluster-14487.11586 | XP_005715401.1 | unnamed protein product [Chondrus crispus]>gi|507111876|emb|CDF35582.1| unnamed protein product [Chondrus crispus] |
| Cluster-14487.15703_5 | SNF2 | Cluster-14487.15703 | XP_005715401.1 | unnamed protein product [Chondrus crispus]>gi|507111876|emb|CDF35582.1| unnamed protein product [Chondrus crispus] |
| Cluster-14487.14491_3 | SNF2 | Cluster-14487.14491 | XP_005711750.1 | unnamed protein product [Chondrus crispus]>gi|507108085|emb|CDF32085.1| unnamed protein product [Chondrus crispus] |
| Cluster-14487.11660_1 | SNF2 | Cluster-14487.11660 | XP_005719085.1 | unnamed protein product [Chondrus crispus]>gi|507115741|emb|CDF39174.1| unnamed protein product [Chondrus crispus] |
| Cluster-14487.11661_1 | SNF2 | Cluster-14487.11661 | XP_005719085.1 | unnamed protein product [Chondrus crispus]>gi|507115741|emb|CDF39174.1| unnamed protein product [Chondrus crispus] |
| Cluster-14487.19543_5 | SNF2 | Cluster-14487.19543 | XP_005713605.1 | unnamed protein product [Chondrus crispus]>gi|507110002|emb|CDF33786.1| unnamed protein product [Chondrus crispus] |
| Cluster-14487.21859_3 | SNF2 | Cluster-14487.21859 | XP_005711603.1 | unnamed protein product [Chondrus crispus]>gi|507107909|emb|CDF41309.1| unnamed protein product [Chondrus crispus] |
| Cluster-14487.27390_1 | SNF2 | Cluster-14487.27390 | XP_005719085.1 | unnamed protein product [Chondrus crispus]>gi|507115741|emb|CDF39174.1| unnamed protein product [Chondrus crispus] |
| Cluster-14487.11244_0 | SNF2 | Cluster-14487.11244 | XP_005719085.1 | unnamed protein product [Chondrus crispus]>gi|507115741|emb|CDF39174.1| unnamed protein product [Chondrus crispus] |
| Cluster-14487.16314_5 | SNF2 | Cluster-14487.16314 | XP_005715401.1 | unnamed protein product [Chondrus crispus]>gi|507111876|emb|CDF35582.1| unnamed protein product [Chondrus crispus] |
| Cluster-14487.19495_3 | SNF2 | Cluster-14487.19495 | XP_005715401.1 | unnamed protein product [Chondrus crispus]>gi|507111876|emb|CDF35582.1| unnamed protein product [Chondrus crispus] |
| Cluster-14487.18470_3 | SNF2 | Cluster-14487.18470 | XP_005715401.1 | unnamed protein product [Chondrus crispus]>gi|507111876|emb|CDF35582.1| unnamed protein product [Chondrus crispus] |
| Cluster-14487.21586_5 | SNF2 | Cluster-14487.21586 | XP_005715401.1 | unnamed protein product [Chondrus crispus]>gi|507111876|emb|CDF35582.1| unnamed protein product [Chondrus crispus] |
| Cluster-14487.21587_3 | SNF2 | Cluster-14487.21587 | XP_005715401.1 | unnamed protein product [Chondrus crispus]>gi|507111876|emb|CDF35582.1| unnamed protein product [Chondrus crispus] |
| Cluster-14487.11136_5 | SNF2 | Cluster-14487.11136 | XP_005715401.1 | unnamed protein product [Chondrus crispus]>gi|507111876|emb|CDF35582.1| unnamed protein product [Chondrus crispus] |
| Cluster-14487.17698_3 | SNF2 | Cluster-14487.17698 | XP_005715401.1 | unnamed protein product [Chondrus crispus]>gi|507111876|emb|CDF35582.1| unnamed protein product [Chondrus crispus] |
| Cluster-14487.18471_5 | SNF2 | Cluster-14487.18471 | XP_005715401.1 | unnamed protein product [Chondrus crispus]>gi|507111876|emb|CDF35582.1| unnamed protein product [Chondrus crispus] |
| Cluster-14487.21588_5 | SNF2 | Cluster-14487.21588 | XP_005715401.1 | unnamed protein product [Chondrus crispus]>gi|507111876|emb|CDF35582.1| unnamed protein product [Chondrus crispus] |
| Cluster-14487.17235_4 | SNF2 | Cluster-14487.17235 | XP_005711824.1 | unnamed protein product [Chondrus crispus]>gi|507108159|emb|CDF32159.1| unnamed protein product [Chondrus crispus] |
| Cluster-14487.20043_1 | SOH1 | Cluster-14487.20043 | XP_005715486.1 | electron transfer flavoprotein-ubiquinone oxidoreductase [Chondrus crispus]>gi|507111964|emb|CDF35667.1| electron transfer flavoprotein-ubiquinone oxidoreductase [Chondrus crispus] |
| Cluster-14487.20040_1 | SOH1 | Cluster-14487.20040 | XP_005715486.1 | electron transfer flavoprotein-ubiquinone oxidoreductase [Chondrus crispus]>gi|507111964|emb|CDF35667.1| electron transfer flavoprotein-ubiquinone oxidoreductase [Chondrus crispus] |
| Cluster-14487.17106_1 | SOH1 | Cluster-14487.17106 | XP_005715486.1 | electron transfer flavoprotein-ubiquinone oxidoreductase [Chondrus crispus]>gi|507111964|emb|CDF35667.1| electron transfer flavoprotein-ubiquinone oxidoreductase [Chondrus crispus] |
| Cluster-14487.11082_1 | SOH1 | Cluster-14487.11082 | XP_005715486.1 | electron transfer flavoprotein-ubiquinone oxidoreductase [Chondrus crispus]>gi|507111964|emb|CDF35667.1| electron transfer flavoprotein-ubiquinone oxidoreductase [Chondrus crispus] |
| Cluster-14487.11083_1 | SOH1 | Cluster-14487.11083 | XP_005715486.1 | electron transfer flavoprotein-ubiquinone oxidoreductase [Chondrus crispus]>gi|507111964|emb|CDF35667.1| electron transfer flavoprotein-ubiquinone oxidoreductase [Chondrus crispus] |
| Cluster-14487.20039_1 | SOH1 | Cluster-14487.20039 | XP_005715486.1 | electron transfer flavoprotein-ubiquinone oxidoreductase [Chondrus crispus]>gi|507111964|emb|CDF35667.1| electron transfer flavoprotein-ubiquinone oxidoreductase [Chondrus crispus] |
| Cluster-14487.15119_1 | SOH1 | Cluster-14487.15119 | XP_005715486.1 | electron transfer flavoprotein-ubiquinone oxidoreductase [Chondrus crispus]>gi|507111964|emb|CDF35667.1| electron transfer flavoprotein-ubiquinone oxidoreductase [Chondrus crispus] |
| Cluster-14487.21443_1 | SOH1 | Cluster-14487.21443 | XP_005715485.1 | unnamed protein product [Chondrus crispus]>gi|507111963|emb|CDF35666.1| unnamed protein product [Chondrus crispus] |
| Cluster-14487.14922_1 | SWI/SNF-BAF60b | Cluster-14487.14922 | XP_005718001.1 | DNA-directed RNA polymerase [Chondrus crispus]>gi|507114588|emb|CDF38132.1| DNA-directed RNA polymerase [Chondrus crispus] |
| Cluster-14487.13008_2 | SWI/SNF-BAF60b | Cluster-14487.13008 | XP_005718001.1 | DNA-directed RNA polymerase [Chondrus crispus]>gi|507114588|emb|CDF38132.1| DNA-directed RNA polymerase [Chondrus crispus] |
| Cluster-14487.13140_1 | SWI/SNF-BAF60b | Cluster-14487.13140 | XP_005718001.1 | DNA-directed RNA polymerase [Chondrus crispus]>gi|507114588|emb|CDF38132.1| DNA-directed RNA polymerase [Chondrus crispus] |
| Cluster-14487.14491_3 | SWI/SNF-BAF60b | Cluster-14487.14491 | XP_005711750.1 | unnamed protein product [Chondrus crispus]>gi|507108085|emb|CDF32085.1| unnamed protein product [Chondrus crispus] |
| Cluster-14487.13312_5 | SWI/SNF-BAF60b | Cluster-14487.13312 | AIT69939.1 | alanine transaminase [Gracilaria blodgettii] |
| Cluster-14487.31281_5 | TAZ | Cluster-14487.31281 | XP_002179989.1 | predicted protein [Phaeodactylum tricornutum CCAP 1055/1]>gi|217408246|gb|EEC48180.1| predicted protein [Phaeodactylum tricornutum CCAP 1055/1] |
| Cluster-14487.2394_3 | TAZ | Cluster-14487.2394 | XP_002180126.1 | predicted protein [Phaeodactylum tricornutum CCAP 1055/1]>gi|217408383|gb|EEC48317.1| predicted protein [Phaeodactylum tricornutum CCAP 1055/1] |
