# Supplementary material for: Comprehensive analysis and identification of heat-responsive genes in Agarophyton vermiculophyllum by RNA-sequencing
Source: publisher site journal article supplement (doi:10.1515/bot-2020-0006), 2020-06-29
Supplement: Supplementary file 5 [file j_bot-2020-0006_suppl_008.docx]

| **Supplementary Table S8:** The primers used for differentially expressed genes (DEGs) validation by qRT-PCR. | | | |
| --- | --- | --- | --- |
| Gene ID | Gene annotation | Forward primer (5’-3’) | Reverse primer (5’-3’) |
| Cluster-14487.10723 | heat shock protein 20 | TGATGATGAGTGCCGTCTG | ACCGCTCTTCCCGTTTT |
| Cluster-14487.27831 | heat shock protein 70 | GAGGTTCTACCCGTATCCC | GCCTGAACAGTAGCACCATA |
| Cluster-14487.11334 | Glutamine synthethase | GCGACCACCGAAAGAGAGAA | TGCTTAAGAAGTTGGAGGCG |
| Cluster-14487.11424 | Proton Gradient Regulation 5 | GGTGATAGCCTGCGAGTGAA | ATTTGGACCATTCACCCCTG |
| Cluster-14487.16089 | Coatomer subunit delta | CTGCTTCCAAAGTCGCCCTA | CGTCAACTCAGCCGAGAATG |
| Cluster-14487.19428 | pyruvate dehydrogenase E1 alpha subunit | AAGGTCTGGGGTATCGTTCC | CAGTAGCCCAGCCATGTTCA |
| Cluster-14487.11338 | Extracellular serine proteinase | CTCCGCTGTTACCGTCGTTC | CGCAGACTGTAGCTGGTTGC |
| Cluster-14487.14191 | ADP-ribosylation factor | CACCGTTCTGTGTTGCCAAG | CAGCGTTTCGTTCAGTCTCG |
| Cluster-14487.14810 | ABC transporter-like protein | CCTGGAAAGCGTCTGTGGAT | TAGTCCTATTGGCGTTGGGC |
| Cluster-14487.18937 | phosphatidylinositol transfer protein | TGCGGTACTCCCTGATAAGC | GTCACGAACAACGCTCTCCC |
| **reference** | 18S rRNA | CTTCCTAGACGGACTGTGG | CGAACGGATTTGGAGATT |
